# Supplementary material for: Z-Scheme CoFe2O4/g-C3N4/MWCNT catalyst for the degradation of organic pollutants: electrochemical evaluation and HPLC analysis of the intermediates
Source: Royal Society of Chemistry journal article supplement (doi:10.1039/d6ra02055k), 2026-06-01
Supplement: d6ra02055k1.pdf [file d6ra02055k1.pdf]

## Supporting Information

### **Z-scheme CoFe<sub>2</sub>O<sub>4</sub>/g-C<sub>3</sub>N<sub>4</sub>/MWCNT catalyst for degradation of organic pollutant: Electrochemical evaluation and HPLC analysis of intermediates**

Garima Rana<sup>1</sup>, Ritesh Verma<sup>2</sup>, Eman A. Alabdulkarem<sup>3</sup>, Subha Krishna Rao<sup>4</sup>, Kun-Yi Andrew Lin<sup>5</sup>, Suresh Ghotekar<sup>6,\*</sup>, Ankush Chauhan<sup>6,\*</sup>

<sup>1</sup> Department of Physics, Bahra Research Innovation & Knowledge Cluster (BRIKC), Rayat Bahra University, Greater Mohali 140103, Punjab, India

<sup>2</sup> Department of Physics, Graphic Era (Deemed to be) University, Dehradun, Uttarakhand, India

<sup>3</sup> Department of Chemistry, College of Science, King Saud University, P. O. Box 2455, Riyadh 11451, Saudi Arabia

<sup>4</sup> Centre for Nanoscience and Nanotechnology, International Research Centre, Sathyabama Institute of Science and Technology, Chennai 600119, India

<sup>5</sup> Department of Environmental Engineering & Innovation and Development Center of Sustainable Agriculture, National Chung Hsing University, Taichung, Taiwan

<sup>6</sup> Centre for Herbal Pharmacology and Environmental Sustainability, Chettinad Hospital and Research Institute, Chettinad Academy of Research and Education, Kelambakkam 603103, Tamil Nadu, India

#### **Corresponding authors-**

[ghotekarsuresh7@gmail.com](mailto:ghotekarsuresh7@gmail.com) (S. Ghotekar)

[ankushchauhan18@gmail.com](mailto:ankushchauhan18@gmail.com) (A. Chauhan)

---

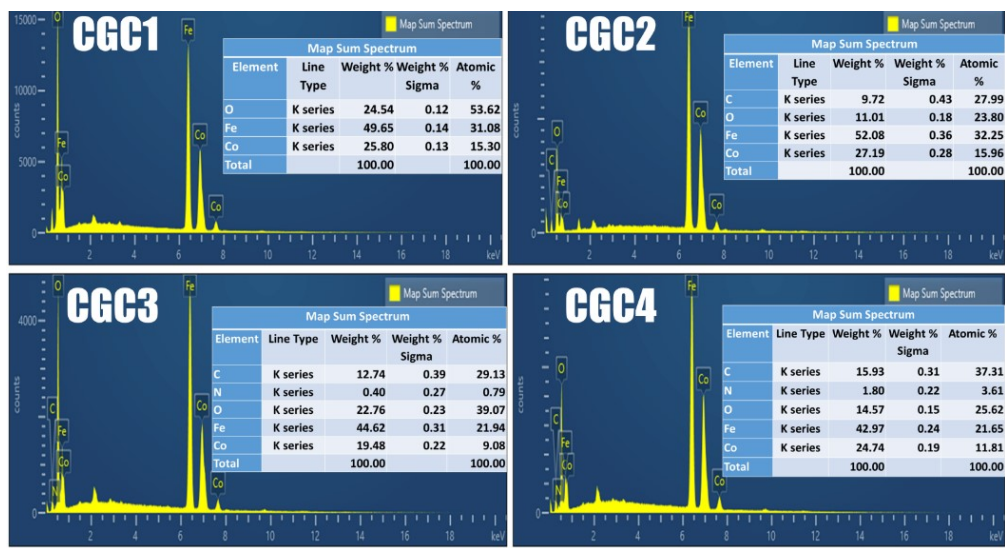

Fig. S1. EDS spectra of CGC1, CGC2, CGC3 and CGC4

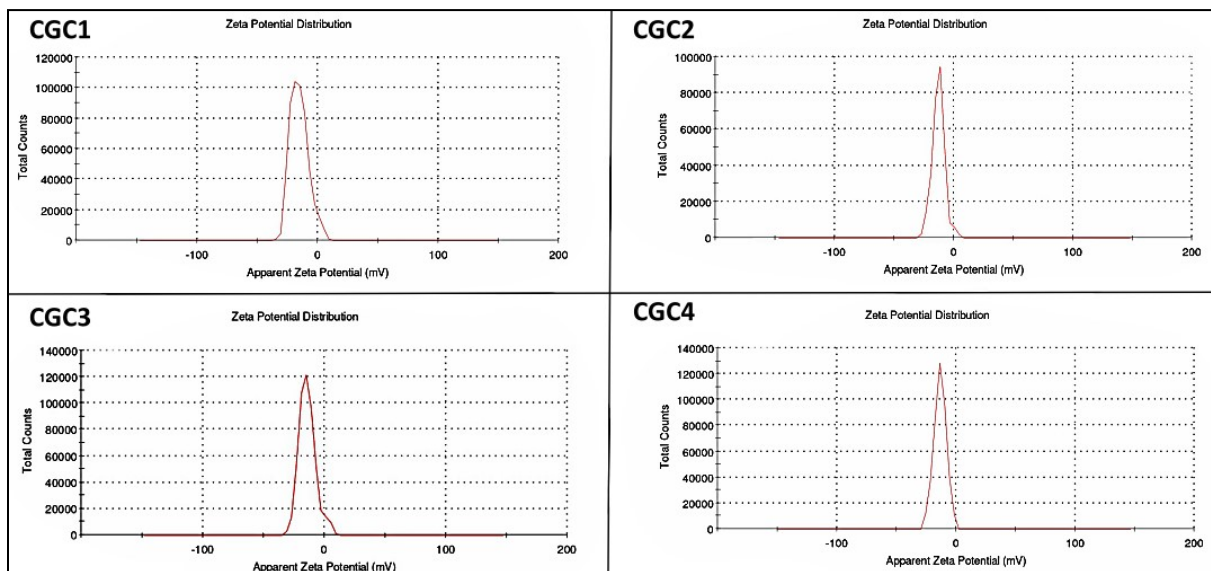

Fig. S2. Zeta potential of pristine and MWCNT, GCN modified  $\text{CoFe}_2\text{O}_4$
